# Supplementary material
Source: publisher site journal article supplement (https://www.dovepress.com/get_supplementary_file.php?f=180971M.xlsx)
Supplement: Supplementary file 1 [file get_supplementary_file.php]

## Sheet: Sheet1
Target	Evidence
AADACL3	predicted (union)
AADAT	predicted (union)
AAED1	predicted (union)
AAGAB	predicted (union)
ABCA13	predicted (union)
ABCA2	predicted (union)
ABCA9	predicted (union)
ABCB8	predicted (union)
ABCC2	predicted (union)
ABCC3	predicted (union)
ABCC4	predicted (union)
ABCC5	predicted (union)
ABCC9	predicted (union)
ABCD2	predicted (union)
ABCD4	predicted (union)
ABCF1	predicted (union)
ABCG4	predicted (union)
ABHD12	predicted (union)
ABHD13	predicted (union)
ABHD5	predicted (union)
ABL1	predicted (union)
ABL2	predicted (union)
ABLIM1	predicted (union)
ABLIM2	predicted (union)
ABLIM3	predicted (union)
ABR	experimental (weak)
ABT1	predicted (union)
ABTB2	predicted (union)
ACACA	predicted (union)
ACACB	predicted (union)
ACADSB	predicted (union)
ACAP3	experimental (weak)
ACBD5	predicted (union)
ACER2	predicted (union)
ACER3	predicted (union)
ACHE	predicted (union)
ACIN1	experimental (weak) + predicted (union)
ACOX1	predicted (union)
ACP1	predicted (union)
ACSL1	predicted (union)
ACSL3	predicted (union)
ACSM2A	predicted (union)
ACSM3	predicted (union)
ACSM4	predicted (union)
ACTB	predicted (union)
ACTG2	predicted (union)
ACTL6A	experimental (weak)
ACTR3	predicted (union)
ACTR3C	predicted (union)
ACTR8	predicted (union)
ACVR1C	predicted (union)
ACVR2A	predicted (union)
ADAL	predicted (union)
ADAM11	predicted (union)
ADAM15	experimental (weak)
ADAM19	predicted (union)
ADAM22	predicted (union)
ADAM29	predicted (union)
ADAM32	predicted (union)
ADAMDEC1	predicted (union)
ADAMTS13	predicted (union)
ADAMTS19	predicted (union)
ADAMTS3	predicted (union)
ADAMTS9	predicted (union)
ADAMTSL1	predicted (union)
ADAT2	predicted (union)
ADCK1	predicted (union)
ADCY1	predicted (union)
ADCY2	predicted (union)
ADCY4	predicted (union)
ADCYAP1	predicted (union)
ADD1	predicted (union)
ADD2	predicted (union)
ADD3	predicted (intersection) + predicted (union)
ADGRA3	predicted (union)
ADGRB3	predicted (union)
ADGRE2	predicted (union)
ADGRG1	predicted (union)
ADGRG6	predicted (union)
ADH1B	predicted (union)
ADI1	predicted (union)
ADNP	predicted (union)
ADORA2A-AS1	predicted (union)
ADPRH	predicted (union)
ADRB3	predicted (union)
AEBP1	predicted (union)
AEBP2	predicted (intersection) + predicted (union)
AFAP1	predicted (union)
AFF1	predicted (union)
AFF2	predicted (union)
AFF4	experimental (weak)
AGFG1	experimental (weak) + predicted (union)
AGO1	predicted (union)
AGPAT3	predicted (union)
AGPAT6	predicted (union)
AGT	predicted (union)
AHI1	experimental (weak)
AHR	predicted (union)
AHRR	experimental (weak)
AIF1L	predicted (union)
AIM1	predicted (union)
AJUBA	predicted (union)
AK4	predicted (union)
AKAP13	predicted (union)
AKIRIN1	predicted (union)
AKNAD1	predicted (union)
AKR1B1	predicted (union)
AKR1D1	predicted (union)
AKT3	predicted (union)
ALCAM	predicted (intersection) + predicted (union)
ALDH5A1	predicted (intersection) + predicted (union)
ALG14	experimental (weak)
ALKBH3	predicted (union)
ALOX15	predicted (union)
ALOXE3	predicted (union)
ALS2	predicted (union)
ALS2CL	predicted (union)
ALYREF	predicted (union)
AMD1	predicted (union)
AMDHD1	predicted (union)
AMER2	predicted (union)
AMMECR1	predicted (union)
AMOTL1	predicted (union)
ANAPC1	predicted (union)
ANGEL2	predicted (union)
ANGPT2	predicted (union)
ANGPTL3	predicted (union)
ANK1	predicted (union)
ANK3	predicted (union)
ANKDD1A	predicted (union)
ANKFY1	predicted (union)
ANKH	predicted (union)
ANKHD1-EIF4EBP3	predicted (union)
ANKIB1	predicted (union)
ANKLE2	predicted (union)
ANKRD11	predicted (union)
ANKRD13A	predicted (union)
ANKRD13C	predicted (intersection) + predicted (union)
ANKRD17	predicted (union)
ANKRD20A1	predicted (union)
ANKRD20A2	predicted (union)
ANKRD20A3	predicted (union)
ANKRD20A4	predicted (union)
ANKRD23	predicted (union)
ANKRD26	predicted (union)
ANKRD28	predicted (union)
ANKRD30A	predicted (union)
ANKRD34C	predicted (union)
ANKRD50	predicted (intersection) + predicted (union)
ANKRD52	predicted (union)
ANKRD6	predicted (union)
ANO3	predicted (union)
ANO5	predicted (union)
ANTXR2	predicted (union)
ANXA13	predicted (union)
ANXA3	predicted (union)
ANXA5	predicted (union)
ANXA7	predicted (union)
AP1G1	predicted (union)
AP3S1	predicted (union)
AP3S2	experimental (weak) + predicted (union)
APBB3	predicted (union)
APC	predicted (union)
APCDD1	predicted (union)
APEX2	predicted (union)
APH1B	predicted (union)
APLP1	predicted (union)
AQP1	predicted (union)
AQP12B	predicted (union)
AQP3	predicted (union)
AQP9	predicted (union)
AR	predicted (union)
ARC	predicted (intersection) + predicted (union)
ARF3	predicted (union)
ARF6	experimental (weak) + predicted (union)
ARFGAP1	predicted (union)
ARFGEF1	predicted (union)
ARFGEF2	predicted (intersection) + predicted (union)
ARFGEF3	predicted (union)
ARHGAP10	predicted (union)
ARHGAP21	predicted (union)
ARHGAP28	predicted (union)
ARHGAP35	predicted (union)
ARHGAP36	predicted (union)
ARHGAP5	predicted (intersection) + predicted (union)
ARHGAP8	predicted (union)
ARHGEF12	predicted (union)
ARHGEF39	predicted (union)
ARHGEF40	predicted (union)
ARID1A	predicted (union)
ARID1B	predicted (union)
ARID3A	predicted (union)
ARID4B	predicted (union)
ARL10	predicted (union)
ARL13B	predicted (union)
ARL15	predicted (intersection) + predicted (union)
ARL17A	predicted (union)
ARL2BP	predicted (union)
ARL4C	predicted (union)
ARL5A	predicted (union)
ARMC1	predicted (union)
ARMC5	predicted (union)
ARMC8	predicted (union)
ARMCX3	predicted (union)
ARMT1	predicted (union)
ARNT	predicted (union)
ARNT2	predicted (union)
ARPIN	predicted (union)
ARPP19	predicted (union)
ARVCF	experimental (weak)
AS3MT	experimental (weak) + predicted (union)
ASAP1	predicted (union)
ASB1	predicted (union)
ASB3	predicted (union)
ASB5	predicted (union)
ASCC2	predicted (union)
ASCL1	predicted (union)
ASH1L	predicted (union)
ASTN1	predicted (intersection) + predicted (union)
ASXL2	predicted (union)
ATAD2	predicted (union)
ATF7IP	predicted (union)
ATF7IP2	predicted (union)
ATG12	predicted (union)
ATG2B	predicted (union)
ATG3	predicted (union)
ATL2	predicted (intersection) + predicted (union)
ATM	experimental (strong) + experimental (weak) + predicted (intersection) + predicted (union)
ATOX1	predicted (union)
ATP10A	predicted (union)
ATP13A1	predicted (union)
ATP13A4	predicted (union)
ATP1A1	experimental (weak)
ATP1B3	predicted (union)
ATP2A2	predicted (union)
ATP2B1	predicted (union)
ATP2B3	predicted (union)
ATP2C1	predicted (union)
ATP2C2	predicted (union)
ATP6V1A	predicted (union)
ATP6V1B2	predicted (union)
ATP6V1G2	predicted (union)
ATP7A	predicted (union)
ATP8A1	predicted (intersection) + predicted (union)
ATP9B	predicted (union)
ATPAF1	predicted (union)
ATPAF2	predicted (union)
ATR	predicted (union)
ATRNL1	predicted (union)
ATXN1	predicted (intersection) + predicted (union)
ATXN1L	predicted (union)
ATXN2	predicted (union)
ATXN2L	predicted (union)
ATXN7	predicted (union)
AXIN2	predicted (union)
AXL	predicted (union)
B3GAT2	predicted (union)
B4GALT1	experimental (weak)
BAALC	predicted (union)
BACH2	predicted (union)
BAG5	predicted (union)
BANK1	predicted (union)
BAP1	predicted (union)
BAZ1B	predicted (union)
BAZ2A	predicted (union)
BBC3	predicted (union)
BBS1	predicted (union)
BBS9	predicted (union)
BBX	predicted (intersection) + predicted (union)
BCAS1	predicted (union)
BCAS3	predicted (union)
BCAT1	predicted (union)
BCL2	experimental (strong)
BCL2L10	experimental (strong) + predicted (union)
BCL7A	predicted (union)
BCL9L	predicted (union)
BDH1	experimental (weak)
BEND3	predicted (union)
BEND7	predicted (union)
BEST1	predicted (union)
BEX1	predicted (union)
BEX4	predicted (union)
BHLHE22	predicted (intersection) + predicted (union)
BHMT2	predicted (union)
BICD1	predicted (union)
BICD2	predicted (union)
BIRC6	predicted (union)
BIVM	predicted (union)
BLOC1S5-TXNDC5	predicted (union)
BMP1	predicted (union)
BMP2K	predicted (union)
BMP4	predicted (union)
BMPR2	predicted (union)
BNIP2	predicted (union)
BNIPL	predicted (union)
BORCS8	predicted (union)
BPI	predicted (union)
BRAF	predicted (union)
BRD7	predicted (union)
BRINP2	predicted (union)
BRMS1L	predicted (union)
BROX	predicted (union)
BRPF3	predicted (union)
BRWD1	predicted (intersection) + predicted (union)
BRWD3	predicted (intersection) + predicted (union)
BSN	predicted (union)
BSND	predicted (union)
BTBD6	predicted (union)
BTF3L4	predicted (union)
BTG2	predicted (union)
BTG3	predicted (intersection) + predicted (union)
BTN1A1	predicted (intersection) + predicted (union)
BTN3A3	predicted (union)
BVES	experimental (weak) + predicted (union)
BZRAP1	predicted (union)
C10ORF105	predicted (union)
C10ORF129	predicted (union)
C10ORF25	predicted (union)
C10ORF67	predicted (union)
C10ORF76	predicted (union)
C10ORF95	predicted (union)
C11ORF21	predicted (union)
C11ORF52	predicted (union)
C11ORF58	predicted (union)
C11ORF87	predicted (intersection) + predicted (union)
C11ORF88	predicted (union)
C11ORF96	predicted (union)
C12ORF76	predicted (union)
C14ORF126	predicted (union)
C14ORF132	predicted (union)
C14ORF23	predicted (union)
C14ORF45	predicted (union)
C15ORF38-AP3S2	predicted (union)
C15orf38-AP3S2	experimental (weak)
C16ORF71	predicted (union)
C16ORF72	predicted (union)
C16ORF87	predicted (union)
C17ORF102	predicted (union)
C17ORF105	predicted (union)
C17ORF112	predicted (union)
C17ORF51	predicted (union)
C1ORF105	predicted (union)
C1ORF122	predicted (union)
C1ORF21	predicted (union)
C1ORF95	predicted (union)
C1QTNF3	predicted (union)
C1QTNF4	predicted (union)
C2	predicted (union)
C21ORF59	predicted (union)
C22ORF24	predicted (union)
C22ORF31	predicted (union)
C2CD2L	predicted (union)
C2ORF69	predicted (union)
C2ORF88	predicted (union)
C2ORF91	predicted (union)
C3ORF49	predicted (union)
C3ORF56	predicted (union)
C3ORF58	predicted (union)
C3ORF67	predicted (union)
C3ORF80	predicted (union)
C4BPB	predicted (union)
C5ORF28	predicted (union)
C5ORF30	predicted (intersection) + predicted (union)
C5ORF51	predicted (union)
C6ORF106	predicted (union)
C7ORF50	predicted (union)
C8ORF17	predicted (union)
C9ORF114	predicted (union)
C9ORF38	predicted (union)
C9ORF78	predicted (union)
CA1	predicted (union)
CA12	experimental (weak) + predicted (intersection) + predicted (union)
CA13	experimental (weak) + predicted (intersection) + predicted (union)
CA5B	predicted (union)
CA8	predicted (union)
CAAP1	predicted (union)
CAB39	predicted (union)
CABLES1	predicted (union)
CABYR	predicted (union)
CACNA1C	predicted (union)
CACNA1H	predicted (union)
CACNA2D1	predicted (union)
CACNA2D2	predicted (union)
CACNB2	predicted (union)
CACNB3	predicted (union)
CACNG3	predicted (union)
CACYBP	predicted (union)
CAD	experimental (weak) + predicted (intersection) + predicted (union)
CADM2	predicted (union)
CAGE1	predicted (union)
CALB1	predicted (union)
CALCB	predicted (union)
CALCOCO1	predicted (union)
CALHM1	predicted (union)
CALM1	predicted (union)
CALM2	predicted (union)
CAMK1D	predicted (union)
CAMK2B	predicted (union)
CAMK2G	predicted (union)
CAMK2N1	predicted (union)
CAMK4	predicted (union)
CAMKK2	predicted (union)
CAMLG	predicted (union)
CAMSAP2	predicted (intersection) + predicted (union)
CAMTA2	predicted (union)
CAND1	predicted (union)
CANX	experimental (weak) + predicted (union)
CAP1	predicted (union)
CAPN10	predicted (union)
CAPN7	predicted (union)
CAPRIN1	predicted (union)
CAPRIN2	predicted (union)
CARD19	predicted (union)
CARS	predicted (union)
CASC3	predicted (union)
CASP10	predicted (union)
CASP4	predicted (union)
CASP7	predicted (union)
CASR	predicted (union)
CATSPERG	predicted (union)
CBFA2T2	predicted (union)
CBL	predicted (union)
CBLN1	predicted (union)
CBLN2	predicted (union)
CBX2	predicted (union)
CBX5	predicted (union)
CCAR2	predicted (union)
CCDC125	predicted (union)
CCDC129	predicted (union)
CCDC144A	predicted (union)
CCDC149	predicted (union)
CCDC152	predicted (union)
CCDC171	predicted (union)
CCDC184	predicted (union)
CCDC25	predicted (union)
CCDC30	predicted (union)
CCDC43	predicted (union)
CCDC57	predicted (union)
CCDC67	predicted (union)
CCDC69	predicted (union)
CCDC7	predicted (union)
CCDC85A	predicted (union)
CCDC88A	predicted (intersection) + predicted (union)
CCL22	predicted (union)
CCL28	predicted (union)
CCM2L	predicted (union)
CCNA2	predicted (union)
CCND1	experimental (weak) + predicted (union)
CCND2	predicted (union)
CCNG2	predicted (union)
CCNH	predicted (union)
CCNI	predicted (union)
CCNK	predicted (union)
CCNL1	experimental (weak) + predicted (union)
CCNT2	predicted (union)
CCPG1	predicted (union)
CCR2	predicted (intersection) + predicted (union)
CCR4	predicted (union)
CCR9	predicted (union)
CCSER2	predicted (union)
CCT5	predicted (union)
CCT6A	experimental (weak)
CD164	predicted (union)
CD300C	predicted (union)
CD300LG	predicted (union)
CD302	predicted (union)
CD44	predicted (union)
CD47	predicted (union)
CD6	predicted (union)
CD84	predicted (union)
CD8A	predicted (union)
CDC20	experimental (weak)
CDC27	predicted (union)
CDC42	predicted (union)
CDC42BPA	predicted (union)
CDC42BPB	predicted (union)
CDC6	predicted (union)
CDC73	predicted (union)
CDCA5	experimental (weak)
CDCP1	predicted (union)
CDH1	predicted (union)
CDH3	predicted (union)
CDH6	predicted (union)
CDH8	predicted (union)
CDH9	predicted (union)
CDHR3	predicted (union)
CDHR5	predicted (union)
CDK11A	predicted (union)
CDK12	predicted (union)
CDK13	predicted (union)
CDK14	predicted (union)
CDK18	predicted (union)
CDK19	experimental (strong) + predicted (intersection) + predicted (union)
CDK2	predicted (union)
CDK5R1	predicted (union)
CDON	predicted (union)
CDR2L	predicted (union)
CDS2	predicted (union)
CEACAM1	predicted (union)
CELF1	predicted (union)
CELF2	predicted (union)
CEMIP	predicted (union)
CENPC	predicted (union)
CENPE	predicted (union)
CENPK	predicted (union)
CEP120	predicted (union)
CEP192	predicted (union)
CEP350	predicted (union)
CEP44	predicted (union)
CEP68	predicted (union)
CEP72	predicted (intersection) + predicted (union)
CEP85L	predicted (union)
CEP95	predicted (union)
CES5A	predicted (union)
CFAP54	predicted (union)
CFAP58	predicted (union)
CFAP65	predicted (union)
CFAP97	predicted (union)
CFL2	predicted (union)
CGGBP1	predicted (union)
CHCHD1	predicted (union)
CHD5	predicted (union)
CHD6	predicted (union)
CHD9	predicted (union)
CHEK2	predicted (union)
CHID1	predicted (union)
CHL1	predicted (union)
CHML	predicted (union)
CHPT1	predicted (union)
CHRM2	predicted (intersection) + predicted (union)
CHRM3	predicted (union)
CHRNA2	predicted (union)
CHRNB3	predicted (union)
CHST14	predicted (union)
CHST15	predicted (union)
CHST4	predicted (union)
CHTF8	predicted (union)
CIB2	predicted (union)
CIITA	predicted (union)
CIRH1A	predicted (union)
CISD1	predicted (union)
CIZ1	experimental (weak)
CKAP2L	predicted (union)
CKAP5	experimental (weak) + predicted (union)
CLASP2	predicted (union)
CLCA2	predicted (union)
CLCC1	predicted (union)
CLCN2	predicted (union)
CLCN4	predicted (union)
CLCN5	predicted (union)
CLDN1	predicted (union)
CLDN16	predicted (union)
CLDN2	predicted (union)
CLEC1B	predicted (union)
CLEC4D	predicted (union)
CLEC4E	predicted (union)
CLEC6A	predicted (union)
CLHC1	predicted (union)
CLIC5	predicted (union)
CLIP3	predicted (union)
CLK1	predicted (union)
CLK2	predicted (union)
CLK3	predicted (union)
CLN3	predicted (union)
CLN8	experimental (weak)
CLNK	predicted (union)
CLOCK	predicted (union)
CLTC	predicted (union)
CLUAP1	predicted (union)
CLVS1	predicted (union)
CMC1	predicted (union)
CMPK1	predicted (union)
CMTM4	predicted (union)
CMTM6	predicted (union)
CNDP1	predicted (union)
CNIH3	predicted (union)
CNIH4	predicted (union)
CNNM2	predicted (union)
CNOT3	predicted (union)
CNOT4	predicted (union)
CNOT6	predicted (union)
CNOT6L	predicted (union)
CNOT8	predicted (union)
CNP	predicted (union)
CNST	predicted (union)
CNTN2	predicted (union)
CNTNAP3B	predicted (union)
COG1	predicted (union)
COG3	predicted (union)
COG4	predicted (union)
COG5	predicted (union)
COG6	predicted (union)
COL12A1	predicted (union)
COL14A1	predicted (union)
COL1A1	predicted (union)
COL1A2	predicted (union)
COL20A1	predicted (union)
COL25A1	predicted (union)
COL27A1	predicted (union)
COL4A4	predicted (union)
COL5A2	predicted (union)
COL5A3	predicted (union)
COL6A2	predicted (union)
COL9A2	predicted (intersection) + predicted (union)
COMMD2	predicted (union)
COMMD4	predicted (union)
COPA	predicted (union)
COPS7A	predicted (union)
COPZ1	predicted (union)
COQ10A	predicted (union)
COQ10B	predicted (union)
COQ6	predicted (union)
COQ9	predicted (union)
CORO2A	predicted (union)
CORO7	predicted (union)
COX6A1	predicted (union)
COX6A1P2	predicted (union)
COX7B	experimental (weak)
CP	predicted (union)
CPLX1	predicted (union)
CPNE6	predicted (union)
CPSF7	predicted (union)
CPXM1	predicted (union)
CRACR2A	predicted (union)
CRB1	experimental (weak) + predicted (union)
CRCP	predicted (union)
CREB3L2	predicted (union)
CREB5	predicted (union)
CREBL2	experimental (weak) + predicted (intersection) + predicted (union)
CREBRF	predicted (union)
CREG2	predicted (union)
CRHR2	predicted (union)
CRIM1	experimental (weak) + predicted (intersection) + predicted (union)
CRISPLD1	predicted (union)
CRK	predicted (union)
CRNKL1	predicted (union)
CRTAP	predicted (union)
CRTC2	predicted (union)
CRX	predicted (union)
CRYL1	predicted (union)
CSDE1	predicted (union)
CSF3	predicted (union)
CSGALNACT1	predicted (union)
CSH2	predicted (union)
CSHL1	predicted (union)
CSMD1	predicted (union)
CSMD2	predicted (union)
CSMD3	predicted (union)
CSNK1D	predicted (union)
CSNK1E	predicted (union)
CSNK2A1	predicted (union)
CSPP1	predicted (union)
CSRNP1	predicted (union)
CSRNP3	experimental (weak) + predicted (union)
CSTF2	predicted (union)
CT45A1	predicted (union)
CT45A2	predicted (union)
CT45A3	predicted (union)
CT45A4	predicted (union)
CT45A5	predicted (union)
CT45A6	predicted (union)
CTDSP1	predicted (union)
CTDSPL	experimental (weak) + predicted (intersection) + predicted (union)
CTF1	predicted (union)
CTGF	experimental (strong) + predicted (intersection) + predicted (union)
CTLA4	predicted (union)
CTNNA3	predicted (union)
CTNND2	predicted (union)
CTPS2	predicted (union)
CTSF	predicted (union)
CTU1	predicted (union)
CUL4A	experimental (weak)
CX3CL1	predicted (union)
CXCL5	predicted (union)
CXCR5	predicted (union)
CXORF22	predicted (union)
CXORF23	predicted (union)
CXORF40A	predicted (intersection) + predicted (union)
CXORF40B	predicted (union)
CXorf40B	experimental (weak)
CXXC4	predicted (union)
CYB561	predicted (union)
CYB5R2	predicted (union)
CYBASC3	predicted (union)
CYLC2	predicted (union)
CYP11B1	predicted (union)
CYP19A1	predicted (union)
CYP2A7	predicted (union)
CYP39A1	predicted (union)
CYP46A1	predicted (union)
CYP4A22	predicted (union)
CYP4B1	predicted (union)
CYP4F11	predicted (intersection) + predicted (union)
CYP4X1	predicted (union)
CYP7A1	predicted (union)
CYTH4	predicted (union)
DAAM2	experimental (weak) + predicted (intersection) + predicted (union)
DAB1	predicted (union)
DAB2	predicted (union)
DACH2	predicted (union)
DAD1	predicted (union)
DAND5	predicted (union)
DAPK1	predicted (union)
DBNL	predicted (union)
DBX2	predicted (union)
DCAF17	predicted (union)
DCAF4	experimental (weak)
DCAF4L2	predicted (union)
DCAF5	predicted (union)
DCAF7	experimental (weak) + predicted (union)
DCAF8	experimental (weak) + predicted (union)
DCAKD	predicted (union)
DCDC2	predicted (union)
DCDC5	predicted (union)
DCLK1	predicted (union)
DCLRE1C	predicted (union)
DCP2	predicted (union)
DCTN2	experimental (weak)
DCTN5	experimental (weak) + predicted (union)
DCUN1D3	experimental (weak) + predicted (union)
DCUN1D4	predicted (union)
DCX	predicted (union)
DDAH1	experimental (weak)
DDB1	predicted (union)
DDI2	predicted (union)
DDX11	predicted (union)
DDX18	predicted (union)
DDX31	predicted (union)
DDX41	predicted (union)
DDX5	experimental (weak)
DDX51	predicted (union)
DDX52	predicted (union)
DECR2	predicted (union)
DEDD2	predicted (union)
DENND1A	predicted (union)
DENND3	predicted (intersection) + predicted (union)
DENND5B	predicted (union)
DERL3	predicted (union)
DFFA	predicted (union)
DFFB	predicted (union)
DGCR6	predicted (union)
DGCR6L	predicted (union)
DGKA	predicted (union)
DGKB	predicted (union)
DGKG	predicted (union)
DGUOK	predicted (union)
DHCR24	predicted (union)
DHCR7	predicted (union)
DHDDS	predicted (union)
DHRS11	predicted (union)
DHRS4	predicted (union)
DHRS4L2	predicted (union)
DIAPH1	experimental (weak) + predicted (union)
DIAPH2	predicted (union)
DICER1	experimental (strong) + experimental (weak) + predicted (intersection) + predicted (union)
DIO3	predicted (union)
DIP2C	predicted (intersection) + predicted (union)
DIRAS2	predicted (intersection) + predicted (union)
DISC1	predicted (union)
DISP3	predicted (union)
DKC1	predicted (union)
DKK1	predicted (union)
DLAT	predicted (union)
DLG1	predicted (union)
DLGAP4	predicted (union)
DLL4	predicted (union)
DLST	predicted (union)
DLX6	predicted (union)
DMP1	predicted (union)
DMXL1	predicted (union)
DMXL2	predicted (union)
DNAH2	predicted (union)
DNAI2	predicted (union)
DNAJA2	predicted (union)
DNAJB5	predicted (union)
DNAJC16	predicted (intersection) + predicted (union)
DNAJC21	predicted (union)
DNAJC25	predicted (union)
DNAJC8	predicted (union)
DNAJC9-AS1	predicted (union)
DNASE1	predicted (union)
DNHD1	predicted (union)
DNM3	predicted (union)
DNMT1	experimental (strong) + predicted (union)
DNMT3B	predicted (union)
DOCK4	predicted (intersection) + predicted (union)
DOCK7	predicted (union)
DONSON	predicted (union)
DOT1L	predicted (union)
DPAGT1	predicted (union)
DPCR1	predicted (union)
DPP10	predicted (union)
DPP8	predicted (union)
DPY19L1	predicted (union)
DPY19L3	predicted (intersection) + predicted (union)
DPYD	predicted (union)
DPYSL3	predicted (union)
DR1	predicted (union)
DRAM2	predicted (union)
DSC1	predicted (intersection) + predicted (union)
DSC3	predicted (union)
DSG4	predicted (union)
DST	predicted (union)
DSTYK	predicted (union)
DTL	predicted (union)
DTNB	predicted (union)
DTWD1	predicted (union)
DTX1	predicted (union)
DUOX2	predicted (union)
DUSP10	predicted (union)
DUSP14	predicted (union)
DUSP22	predicted (union)
DUSP5	predicted (union)
DUXA	predicted (union)
DVL1	predicted (union)
DVL3	predicted (union)
DYM	predicted (union)
DZIP1	predicted (union)
E2F5	predicted (union)
EAF2	predicted (union)
EBF1	predicted (union)
EBF2	predicted (union)
ECHS1	predicted (union)
EDA2R	predicted (union)
EDNRB	predicted (union)
EDRF1	predicted (union)
EEA1	predicted (union)
EEF1A1	experimental (weak)
EEF2	experimental (weak)
EFCAB14	experimental (weak) + predicted (union)
EFCAB5	predicted (union)
EFHB	predicted (union)
EFHC1	predicted (union)
EFHD2	predicted (union)
EFNB2	predicted (union)
EFR3A	predicted (union)
EFS	predicted (union)
EGLN3	predicted (union)
EHBP1	predicted (union)
EHMT1	predicted (union)
EIF2AK3	predicted (union)
EIF2AK4	predicted (union)
EIF2B2	predicted (union)
EIF3G	predicted (union)
EIF4E	predicted (union)
EIF4EBP2	experimental (weak) + predicted (union)
EIF4ENIF1	predicted (union)
EIF4H	predicted (union)
EIF5A2	predicted (union)
ELF3	predicted (union)
ELK4	predicted (union)
ELL2	predicted (union)
ELMOD2	predicted (union)
ELOVL1	predicted (intersection) + predicted (union)
ELOVL2	predicted (union)
ELOVL5	predicted (union)
ELP2	predicted (union)
EMB	predicted (union)
EMC1	predicted (union)
EMILIN2	predicted (union)
EMP2	predicted (union)
ENC1	predicted (union)
ENDOD1	predicted (union)
ENPP1	predicted (union)
ENPP6	predicted (union)
ENSA	predicted (union)
ENTPD1	predicted (union)
ENTPD5	predicted (union)
ENTPD7	predicted (union)
EP400	predicted (union)
EPB41L1	predicted (intersection) + predicted (union)
EPB41L4A	predicted (union)
EPDR1	predicted (union)
EPHA10	predicted (union)
EPHA4	predicted (union)
EPHA5	predicted (union)
EPHA6	predicted (union)
EPHA7	predicted (union)
EPHA8	predicted (union)
EPM2A	predicted (union)
EPM2AIP1	predicted (union)
EPPK1	predicted (union)
EPS8	predicted (union)
ERBB2	predicted (union)
ERC2	predicted (union)
ERCC1	predicted (union)
EREG	predicted (union)
ERGIC2	predicted (union)
ERI1	predicted (intersection) + predicted (union)
ERICH3	predicted (union)
ERLIN1	predicted (intersection) + predicted (union)
ERMAP	predicted (union)
ERRFI1	experimental (weak)
ERV3-1	predicted (union)
ERVFRD-1	predicted (union)
ERVW-1	predicted (union)
ESCO2	predicted (intersection) + predicted (union)
ESPL1	predicted (union)
ESR1	experimental (strong) + predicted (intersection) + predicted (union)
ESR2	predicted (union)
ESRP1	predicted (union)
ESYT2	predicted (union)
ETFA	experimental (weak)
ETFBKMT	predicted (union)
ETNK2	predicted (union)
ETS2	experimental (weak)
ETV3	predicted (union)
ETV4	predicted (union)
ETV6	predicted (intersection) + predicted (union)
EVI5	predicted (union)
EXD3	predicted (union)
EXOC3L4	predicted (union)
EXOC5	predicted (union)
EXOC6	predicted (union)
EXOC6B	predicted (union)
EXOC7	predicted (union)
EXOG	predicted (union)
EXOSC10	predicted (union)
EXPH5	predicted (union)
EXT1	predicted (union)
EYA4	predicted (union)
EZH1	predicted (union)
EZR	experimental (weak) + predicted (union)
F13A1	predicted (union)
F3	experimental (weak) + predicted (intersection) + predicted (union)
FAAP20	predicted (union)
FAF1	predicted (union)
FAF2	predicted (union)
FAM101A	predicted (union)
FAM104A	experimental (weak) + predicted (union)
FAM110C	predicted (union)
FAM114A2	predicted (union)
FAM117B	predicted (union)
FAM120C	experimental (weak) + predicted (intersection) + predicted (union)
FAM124A	predicted (union)
FAM127B	experimental (weak)
FAM131B	predicted (union)
FAM132B	predicted (union)
FAM136A	predicted (union)
FAM13B	predicted (union)
FAM149B1	predicted (union)
FAM151B	predicted (union)
FAM153A	predicted (union)
FAM153B	predicted (union)
FAM160A1	predicted (union)
FAM160B1	predicted (union)
FAM161B	predicted (union)
FAM166B	predicted (union)
FAM168B	predicted (union)
FAM171B	predicted (union)
FAM173B	experimental (weak)
FAM182A	predicted (union)
FAM188A	predicted (union)
FAM189A1	predicted (union)
FAM189B	predicted (union)
FAM18A	predicted (union)
FAM192A	predicted (union)
FAM195A	experimental (weak) + predicted (intersection) + predicted (union)
FAM196A	predicted (intersection) + predicted (union)
FAM198B	predicted (union)
FAM201A	predicted (union)
FAM205BP	predicted (union)
FAM212B	predicted (union)
FAM213B	predicted (union)
FAM216B	predicted (union)
FAM222B	predicted (union)
FAM229B	predicted (union)
FAM22D	predicted (union)
FAM22G	predicted (union)
FAM26E	predicted (union)
FAM3C	experimental (weak) + predicted (intersection) + predicted (union)
FAM46A	predicted (union)
FAM46B	predicted (union)
FAM53A	predicted (union)
FAM69A	predicted (union)
FAM73A	predicted (union)
FAM78B	predicted (union)
FAM83H	predicted (union)
FAM89A	predicted (union)
FAM8A1	predicted (union)
FAM9B	predicted (union)
FANCG	predicted (union)
FANCI	predicted (union)
FAS	experimental (weak)
FASTK	predicted (union)
FAT3	predicted (union)
FAU	predicted (union)
FAXDC2	predicted (union)
FBN1	predicted (union)
FBP1	predicted (intersection) + predicted (union)
FBP2	predicted (union)
FBXL12	predicted (union)
FBXL16	predicted (union)
FBXL18	predicted (union)
FBXL2	predicted (union)
FBXL3	experimental (weak) + predicted (union)
FBXL4	predicted (union)
FBXL5	predicted (union)
FBXO15	predicted (union)
FBXO25	predicted (union)
FBXO28	predicted (intersection) + predicted (union)
FBXO30	predicted (union)
FBXO31	predicted (union)
FBXO32	predicted (union)
FBXO33	predicted (union)
FBXO38	predicted (union)
FBXO9	predicted (union)
FBXW11	predicted (union)
FBXW4	predicted (union)
FCAMR	predicted (union)
FCGR2A	predicted (union)
FCGR2B	experimental (strong) + predicted (intersection) + predicted (union)
FCHSD2	predicted (intersection) + predicted (union)
FCRL2	predicted (union)
FDX1	predicted (union)
FDXACB1	predicted (union)
FEM1C	experimental (weak) + predicted (union)
FER	predicted (union)
FERMT1	predicted (union)
FERMT2	predicted (union)
FFAR2	predicted (union)
FGD6	predicted (union)
FGF1	predicted (intersection) + predicted (union)
FGF13	predicted (union)
FGF20	predicted (union)
FGF23	predicted (union)
FGFBP3	predicted (union)
FGFR3	predicted (union)
FHDC1	predicted (union)
FHIT	predicted (union)
FHOD3	predicted (union)
FIBIN	predicted (union)
FKBP15	predicted (union)
FKBP5	predicted (union)
FKBP7	predicted (union)
FKTN	predicted (intersection) + predicted (union)
FLNA	predicted (union)
FLRT2	predicted (union)
FLRT3	predicted (union)
FLT1	predicted (union)
FMN1	predicted (union)
FMN2	predicted (union)
FMNL3	predicted (union)
FMO2	predicted (union)
FN1	predicted (union)
FNBP1	predicted (union)
FNDC3A	predicted (union)
FNDC3B	predicted (intersection) + predicted (union)
FNIP2	predicted (union)
FNTB	predicted (union)
FOSL2	predicted (union)
FOXD4L2	predicted (union)
FOXD4L4	predicted (union)
FOXD4L5	predicted (union)
FOXH1	predicted (union)
FOXJ2	predicted (union)
FOXK2	predicted (union)
FOXN1	predicted (union)
FOXN2	predicted (union)
FOXN3	predicted (union)
FOXN3-AS1	predicted (union)
FOXO3	predicted (union)
FOXP2	predicted (union)
FPGT-TNNI3K	predicted (union)
FRAS1	predicted (union)
FREM1	predicted (union)
FREM2	predicted (union)
FRMD4A	predicted (union)
FRMPD3	predicted (union)
FRS2	predicted (intersection) + predicted (union)
FRYL	predicted (intersection) + predicted (union)
FSCN2	predicted (union)
FSCN3	predicted (union)
FSD1L	predicted (union)
FSD2	predicted (union)
FSIP2	predicted (union)
FSTL1	predicted (union)
FTSJ1	predicted (union)
FUBP1	predicted (union)
FUNDC2	predicted (union)
FUT1	predicted (union)
FXR1	predicted (union)
FZD3	predicted (union)
FZD8	predicted (union)
G2E3	predicted (union)
G6PC3	predicted (union)
GAB1	predicted (intersection) + predicted (union)
GAB2	predicted (union)
GABARAPL1	predicted (union)
GABARAPL2	predicted (union)
GABPA	experimental (weak) + predicted (union)
GABPB2	predicted (union)
GABRA4	predicted (union)
GABRB2	predicted (union)
GABRG2	predicted (union)
GABRQ	predicted (union)
GADL1	predicted (union)
GAK	predicted (union)
GALNT10	predicted (union)
GALNT14	predicted (union)
GALNT15	predicted (union)
GALNT7	predicted (union)
GANC	predicted (union)
GART	predicted (union)
GAS2L3	predicted (union)
GAS8	predicted (union)
GATAD1	predicted (union)
GATSL3	predicted (union)
GBAS	predicted (union)
GBP1	predicted (union)
GCC2	predicted (union)
GCH1	experimental (weak)
GCLC	predicted (intersection) + predicted (union)
GCM2	predicted (union)
GCNT2	predicted (union)
GCOM1	predicted (union)
GCSAML	predicted (union)
GDAP2	experimental (weak)
GDF6	predicted (union)
GFOD1	predicted (union)
GFPT1	predicted (union)
GFRA1	predicted (union)
GFRA2	predicted (union)
GFRAL	predicted (union)
GGA2	predicted (union)
GGCX	predicted (union)
GGH	predicted (union)
GGNBP2	predicted (union)
GGPS1	predicted (union)
GIF	predicted (union)
GIGYF1	experimental (weak) + predicted (intersection) + predicted (union)
GIGYF2	predicted (union)
GIN1	predicted (union)
GINS1	predicted (union)
GIPC3	predicted (union)
GIT2	predicted (union)
GJD2	predicted (union)
GK	predicted (union)
GK2	predicted (union)
GLB1L3	predicted (union)
GLI2	predicted (union)
GLI3	predicted (union)
GLIPR1L2	predicted (union)
GLIS3	predicted (union)
GLRB	predicted (intersection) + predicted (union)
GLRX5	experimental (weak)
GLT6D1	predicted (union)
GLUL	predicted (union)
GLYR1	predicted (union)
GMCL1	predicted (union)
GMPR	predicted (intersection) + predicted (union)
GMPS	predicted (union)
GNA11	predicted (intersection) + predicted (union)
GNA12	predicted (union)
GNA14	predicted (union)
GNA15	predicted (union)
GNAI2	predicted (union)
GNAQ	predicted (union)
GNAS	experimental (weak)
GNAZ	predicted (union)
GNB1	predicted (union)
GNB4	predicted (union)
GNB5	predicted (union)
GNE	predicted (union)
GNG2	predicted (union)
GNGT1	predicted (union)
GNGT2	predicted (union)
GNL1	experimental (weak) + predicted (intersection) + predicted (union)
GNPDA2	predicted (union)
GNPTG	predicted (union)
GNS	predicted (union)
GOLGA1	predicted (union)
GOLGB1	predicted (union)
GORASP2	predicted (union)
GPAM	predicted (union)
GPATCH2	predicted (union)
GPATCH2L	predicted (union)
GPATCH8	predicted (union)
GPBP1	predicted (union)
GPER1	predicted (union)
GPM6A	predicted (union)
GPM6B	predicted (union)
GPR151	predicted (union)
GPR153	predicted (union)
GPR158	predicted (intersection) + predicted (union)
GPR173	predicted (union)
GPR174	predicted (union)
GPR176	predicted (union)
GPR26	predicted (union)
GPR61	predicted (union)
GPR85	predicted (union)
GPR88	predicted (union)
GPR89A	predicted (union)
GPR89B	predicted (union)
GPR89C	predicted (union)
GPRIN2	predicted (intersection) + predicted (union)
GPRIN3	predicted (union)
GPX2	predicted (union)
GRAMD1B	predicted (union)
GRHL2	predicted (union)
GRHL3	predicted (union)
GRIA4	predicted (union)
GRIK4	predicted (union)
GRIN2A	predicted (union)
GRIN2B	predicted (union)
GRIP1	predicted (union)
GRM1	predicted (union)
GRM4	predicted (union)
GRM5	predicted (union)
GRM8	predicted (union)
GRPEL1	predicted (union)
GSE1	predicted (union)
GSG1	predicted (union)
GSK3B	predicted (union)
GSPT1	predicted (union)
GSTM2	predicted (union)
GTF2A1	predicted (intersection) + predicted (union)
GTF2A1L	predicted (union)
GTF2H1	predicted (union)
GTF3C1	predicted (union)
GTPBP1	predicted (union)
GTPBP3	predicted (union)
GUCY1A2	predicted (union)
GUF1	predicted (union)
GULP1	predicted (union)
GXYLT1	predicted (union)
GYG2	predicted (union)
H2AFX	predicted (union)
HADHA	predicted (union)
HAGH	predicted (union)
HAP1	predicted (union)
HAS2	predicted (union)
HAUS5	predicted (union)
HBG2	predicted (union)
HBS1L	predicted (union)
HCFC2	predicted (union)
HCK	predicted (union)
HDAC5	predicted (union)
HDAC6	predicted (union)
HDAC9	predicted (intersection) + predicted (union)
HDHD2	predicted (union)
HDX	predicted (union)
HEATR3	predicted (union)
HEATR6	predicted (union)
HEBP1	predicted (union)
HECTD3	predicted (union)
HECTD4	predicted (union)
HEG1	predicted (intersection) + predicted (union)
HELZ	predicted (union)
HEMK1	predicted (union)
HEPH	predicted (union)
HEPHL1	predicted (union)
HERC1	experimental (weak)
HERC2	predicted (union)
HERC3	predicted (union)
HEXIM1	predicted (union)
HEY1	predicted (union)
HHIP	predicted (union)
HHIPL2	predicted (union)
HHLA3	predicted (union)
HIC2	predicted (union)
HIF1A	experimental (weak) + predicted (intersection) + predicted (union)
HIF1AN	predicted (union)
HIF3A	predicted (union)
HINFP	predicted (union)
HINT3	predicted (union)
HIP1	predicted (union)
HIPK2	predicted (union)
HIVEP1	predicted (union)
HLA-DQA1	predicted (union)
HLF	predicted (intersection) + predicted (union)
HMBOX1	predicted (intersection) + predicted (union)
HMG20B	predicted (union)
HMGA2	predicted (union)
HMGCS1	experimental (weak) + predicted (intersection) + predicted (union)
HMMR	predicted (union)
HMX3	predicted (union)
HNMT	predicted (union)
HNRNPA2B1	predicted (union)
HNRNPAB	predicted (union)
HNRNPDL	predicted (union)
HNRNPLL	predicted (union)
HNRNPR	experimental (weak) + predicted (union)
HOMER1	predicted (union)
HOMER2	predicted (union)
HORMAD2	predicted (union)
HOXA9	experimental (weak) + predicted (union)
HOXB1	predicted (union)
HOXC13	predicted (union)
HOXD13	predicted (union)
HOXD3	predicted (union)
HP	predicted (union)
HPCAL1	predicted (union)
HPR	predicted (union)
HPSE	predicted (intersection) + predicted (union)
HRK	predicted (union)
HS1BP3	predicted (union)
HS3ST4	predicted (union)
HS3ST6	predicted (union)
HS6ST2	predicted (union)
HSBP1L1	predicted (union)
HSD3B7	predicted (union)
HSDL2	predicted (union)
HSF2	experimental (strong) + predicted (intersection) + predicted (union)
HSF5	predicted (intersection) + predicted (union)
HSPA4L	predicted (union)
HSPA5	predicted (union)
HSPB2-C11ORF52	predicted (union)
HTN3	predicted (union)
HTR1D	predicted (union)
HUNK	predicted (union)
HUWE1	predicted (union)
HYDIN	predicted (union)
HYPK	predicted (union)
ICA1L	predicted (union)
ICE2	predicted (union)
ID4	experimental (weak) + predicted (union)
IDH3A	predicted (union)
IDH3G	predicted (union)
IDS	predicted (union)
IER2	predicted (union)
IER5	predicted (union)
IFIH1	predicted (union)
IFIT2	predicted (union)
IFNA1	predicted (intersection) + predicted (union)
IFNA2	predicted (intersection) + predicted (union)
IFNAR2	experimental (weak) + predicted (intersection) + predicted (union)
IFNLR1	predicted (union)
IFT122	predicted (union)
IFT140	predicted (union)
IGF1	predicted (union)
IGF1R	predicted (union)
IGF2-AS	predicted (union)
IGF2BP2	experimental (weak) + predicted (intersection) + predicted (union)
IGF2BP2-AS1	predicted (union)
IGF2BP3	predicted (union)
IGF2R	predicted (union)
IGFL1	predicted (union)
IGHMBP2	experimental (weak)
IGSF10	predicted (union)
IGSF3	predicted (union)
IGSF9B	predicted (union)
IKBKAP	predicted (union)
IKBKE	predicted (union)
IKZF2	predicted (union)
IL10	predicted (union)
IL12RB2	predicted (union)
IL15	predicted (union)
IL16	predicted (union)
IL17B	predicted (intersection) + predicted (union)
IL17RA	predicted (union)
IL17RD	predicted (union)
IL1RAPL2	predicted (union)
IL20RB	predicted (union)
IL22RA1	predicted (union)
IL31RA	predicted (union)
IL4R	predicted (union)
IL6ST	predicted (union)
IL7R	predicted (union)
IL9R	predicted (union)
IMPG1	predicted (union)
INA	predicted (union)
INADL	predicted (intersection) + predicted (union)
INCENP	predicted (union)
INHBA	predicted (union)
INHBC	predicted (union)
INO80B	predicted (union)
INO80C	predicted (union)
INO80D	predicted (union)
INPP4B	predicted (union)
INPP5A	predicted (union)
INPP5F	predicted (union)
INPPL1	predicted (union)
INSR	predicted (union)
INTS5	predicted (union)
IP6K3	predicted (union)
IPMK	predicted (intersection) + predicted (union)
IPO7	predicted (union)
IPO9	predicted (union)
IQCB1	predicted (union)
IQCE	predicted (union)
IQCH	predicted (union)
IQSEC3	predicted (intersection) + predicted (union)
IRAK3	predicted (union)
IREB2	predicted (union)
IRF2	experimental (weak) + predicted (intersection) + predicted (union)
IRG1	predicted (union)
IRGQ	experimental (weak) + predicted (union)
IRS2	predicted (union)
IRS4	experimental (weak)
ISM1	predicted (union)
ISX	predicted (union)
ITGA2	experimental (weak) + predicted (intersection) + predicted (union)
ITGA3	predicted (union)
ITGA6	predicted (union)
ITGA7	predicted (union)
ITGA8	predicted (union)
ITGA9	predicted (union)
ITGAD	predicted (union)
ITGB3	predicted (union)
ITIH1	predicted (union)
ITIH5	predicted (union)
ITM2B	predicted (union)
ITM2C	experimental (weak) + predicted (union)
ITPR3	predicted (union)
ITPRIPL2	predicted (union)
IWS1	predicted (union)
IYD	predicted (union)
JADE2	predicted (union)
JAKMIP3	predicted (union)
JMJD8	predicted (union)
JMY	experimental (weak) + predicted (union)
JRKL	predicted (union)
KAAG1	predicted (intersection) + predicted (union)
KANK1	predicted (union)
KANSL3	predicted (union)
KBTBD8	predicted (union)
KCMF1	predicted (intersection) + predicted (union)
KCNA1	predicted (intersection) + predicted (union)
KCNA2	predicted (union)
KCND3	predicted (union)
KCNE5	predicted (union)
KCNG3	predicted (union)
KCNH6	predicted (union)
KCNH7	predicted (intersection) + predicted (union)
KCNIP1	predicted (union)
KCNJ16	predicted (union)
KCNJ2	predicted (intersection) + predicted (union)
KCNJ3	predicted (union)
KCNJ5	predicted (union)
KCNK10	predicted (union)
KCNK3	predicted (union)
KCNMA1	predicted (union)
KCNMB1	predicted (union)
KCNMB2	predicted (union)
KCNMB4	predicted (union)
KCNS2	predicted (intersection) + predicted (union)
KCNV1	predicted (union)
KCTD1	predicted (union)
KCTD12	predicted (union)
KCTD16	predicted (union)
KCTD21	predicted (union)
KDELC1	predicted (union)
KDELR3	predicted (union)
KDM1A	predicted (union)
KDM2A	predicted (intersection) + predicted (union)
KDM3A	predicted (union)
KDM3B	predicted (union)
KDM4A	predicted (union)
KDM4B	predicted (union)
KDM5A	predicted (union)
KDM5B	predicted (intersection) + predicted (union)
KDM7A	predicted (intersection) + predicted (union)
KDSR	predicted (union)
KHDRBS1	predicted (union)
KHK	predicted (union)
KHNYN	predicted (union)
KIAA0100	experimental (weak)
KIAA0141	predicted (union)
KIAA0368	predicted (union)
KIAA0430	predicted (union)
KIAA0513	predicted (union)
KIAA0586	predicted (union)
KIAA0895	predicted (union)
KIAA0907	experimental (weak) + predicted (intersection) + predicted (union)
KIAA1033	predicted (union)
KIAA1109	predicted (union)
KIAA1147	predicted (union)
KIAA1161	predicted (union)
KIAA1324	predicted (union)
KIAA1324L	predicted (union)
KIAA1429	predicted (union)
KIAA1462	predicted (union)
KIAA1524	predicted (union)
KIAA1549	predicted (union)
KIAA1644	predicted (union)
KIAA1671	predicted (union)
KIAA1841	predicted (union)
KIAA1958	predicted (union)
KIAA2022	predicted (union)
KIAA2026	predicted (union)
KIF13A	predicted (union)
KIF13B	predicted (union)
KIF3A	predicted (union)
KIF3B	predicted (union)
KIF5A	predicted (union)
KIR2DL3	predicted (union)
KIR2DL4	predicted (union)
KIR3DL1	predicted (union)
KIRREL	predicted (union)
KIT	predicted (union)
KLB	predicted (union)
KLF10	predicted (union)
KLF12	predicted (union)
KLF13	predicted (union)
KLF4	predicted (union)
KLF6	predicted (intersection) + predicted (union)
KLF7	predicted (union)
KLHDC10	predicted (union)
KLHDC2	predicted (union)
KLHL13	predicted (union)
KLHL15	predicted (union)
KLHL20	predicted (intersection) + predicted (union)
KLHL21	predicted (union)
KLHL23	predicted (union)
KLHL3	predicted (union)
KLHL32	predicted (union)
KLHL4	predicted (union)
KLHL42	predicted (intersection) + predicted (union)
KLHL9	predicted (union)
KLK10	predicted (union)
KMT2A	predicted (union)
KMT2B	predicted (union)
KMT2C	predicted (union)
KMT2E	predicted (union)
KMT5A	predicted (union)
KPNA1	predicted (union)
KPNA4	predicted (union)
KPNA5	predicted (union)
KPNA6	predicted (intersection) + predicted (union)
KPNB1	predicted (union)
KRAS	predicted (union)
KRT77	predicted (union)
KRTAP1-1	predicted (union)
KRTAP24-1	predicted (union)
KRTAP4-3	predicted (union)
KSR1	predicted (union)
KSR2	predicted (union)
KTN1	predicted (union)
KTN1-AS1	predicted (union)
L2HGDH	predicted (union)
L3MBTL1	predicted (union)
LACTB2	predicted (intersection) + predicted (union)
LAMA4	predicted (union)
LAMB4	predicted (union)
LANCL2	predicted (union)
LAPTM4B	predicted (union)
LARGE	experimental (weak) + predicted (union)
LARP1	predicted (union)
LARP4B	predicted (union)
LARP6	predicted (union)
LARS	predicted (union)
LAT	predicted (union)
LAX1	predicted (union)
LCK	predicted (union)
LCLAT1	predicted (union)
LCMT1	predicted (union)
LCORL	predicted (union)
LDOC1L	predicted (union)
LEMD3	predicted (union)
LEPR	predicted (union)
LEPROT	predicted (union)
LETM1	predicted (union)
LETM2	predicted (union)
LEXM	predicted (union)
LGALS12	predicted (union)
LGALSL	predicted (union)
LGI2	predicted (union)
LGR6	predicted (union)
LHX9	predicted (union)
LIF	predicted (intersection) + predicted (union)
LILRB4	predicted (union)
LIMD1	predicted (union)
LIN28A	predicted (union)
LIN28B	predicted (union)
LIN54	experimental (weak) + predicted (intersection) + predicted (union)
LIN7A	predicted (union)
LINC00637	predicted (union)
LINC01554	predicted (union)
LINC01555	predicted (union)
LINC01559	predicted (union)
LINGO2	predicted (union)
LIPG	predicted (union)
LITAF	predicted (union)
LIX1L	predicted (union)
LL22NC03-63E9.3	predicted (union)
LMAN2L	predicted (union)
LMBR1L	predicted (union)
LMLN	predicted (union)
LMNB2	experimental (weak)
LMO4	predicted (intersection) + predicted (union)
LMX1B	predicted (union)
LNPEP	predicted (union)
LOC100294341	predicted (union)
LOC100996709	predicted (union)
LOH12CR2	predicted (union)
LONRF2	predicted (union)
LONRF3	predicted (union)
LPAR3	predicted (union)
LPO	predicted (union)
LPP	predicted (union)
LRBA	predicted (union)
LRFN2	predicted (union)
LRIG3	experimental (weak)
LRIT2	predicted (union)
LRP1B	predicted (union)
LRRC10	predicted (union)
LRRC14	predicted (union)
LRRC15	predicted (union)
LRRC27	predicted (union)
LRRC3	predicted (union)
LRRC41	experimental (weak)
LRRC49	predicted (union)
LRRC4B	predicted (union)
LRRC4C	predicted (union)
LRRC58	predicted (union)
LRRC73	predicted (union)
LRRC75A	predicted (union)
LRRC8C	predicted (union)
LRRC8D	predicted (union)
LRRCC1	predicted (union)
LRRD1	predicted (union)
LRRFIP1	predicted (union)
LRRIQ3	predicted (union)
LRRK1	predicted (union)
LRRK2	predicted (union)
LRRTM1	predicted (union)
LSM12	predicted (union)
LSM14B	predicted (intersection) + predicted (union)
LSMEM1	predicted (intersection) + predicted (union)
LSS	predicted (union)
LTBP2	predicted (union)
LTBR	predicted (union)
LUZP1	predicted (union)
LYN	predicted (union)
LYNX1	predicted (union)
LYPD4	predicted (union)
LZTS1	predicted (union)
M1AP	predicted (union)
MACC1	predicted (union)
MADD	predicted (union)
MAGEA1	predicted (union)
MAGEA2	predicted (union)
MAGEA2B	predicted (union)
MAGEA3	predicted (union)
MAGEA6	predicted (union)
MAGI3	predicted (union)
MAML1	predicted (union)
MAN1A1	predicted (union)
MAN1A2	predicted (union)
MAN1B1	predicted (union)
MANEAL	predicted (union)
MAOB	predicted (union)
MAP10	predicted (union)
MAP1A	predicted (union)
MAP1B	predicted (union)
MAP2K3	predicted (union)
MAP3K1	predicted (intersection) + predicted (union)
MAP3K13	predicted (union)
MAP3K2	predicted (union)
MAP3K9	predicted (union)
MAP4	predicted (union)
MAP7D1	experimental (weak) + predicted (intersection) + predicted (union)
MAP7D2	predicted (union)
MAP9	predicted (union)
MAPK12	predicted (union)
MAPK13	experimental (weak)
MAPK14	predicted (union)
MAPK1IP1L	predicted (union)
MAPK3	predicted (union)
MAPK4	predicted (intersection) + predicted (union)
MAPK8	predicted (intersection) + predicted (union)
MAPK8IP2	predicted (union)
MAPKAPK3	predicted (union)
MAPKBP1	predicted (union)
MARCH1	predicted (union)
MARCH2	predicted (union)
MARCH5	predicted (union)
MARCH7	predicted (union)
MARCKS	predicted (union)
MARK4	predicted (union)
MARS	predicted (union)
MASP1	predicted (union)
MAT2A	predicted (union)
MATR3	experimental (weak)
MAU2	predicted (union)
MBD1	experimental (weak) + predicted (union)
MBIP	predicted (union)
MBL2	predicted (union)
MBNL1	predicted (union)
MBNL2	predicted (union)
MBNL3	predicted (union)
MBOAT2	predicted (union)
MBP	predicted (union)
MC1R	predicted (union)
MC2R	predicted (union)
MCCC2	predicted (union)
MCHR2	predicted (union)
MCM5	experimental (weak)
MCMDC2	predicted (union)
MCTP1	predicted (union)
MDC1	experimental (weak)
MDGA1	predicted (union)
MDGA2	predicted (union)
MDH1B	predicted (union)
MDH2	predicted (union)
ME1	predicted (union)
MECOM	predicted (union)
MECP2	predicted (union)
MED1	predicted (union)
MED12L	predicted (union)
MED13	predicted (union)
MED13L	predicted (union)
MED14	predicted (union)
MED17	predicted (union)
MED23	predicted (union)
MED26	predicted (union)
MED8	predicted (union)
MED9	predicted (union)
MEF2C	predicted (intersection) + predicted (union)
MEF2D	predicted (union)
MEIS1	predicted (union)
MERTK	predicted (union)
MESP1	predicted (intersection) + predicted (union)
MET	predicted (union)
METAP2	predicted (union)
METTL21B	predicted (union)
METTL2B	predicted (union)
METTL6	predicted (union)
METTL8	predicted (union)
MFAP2	predicted (union)
MFAP3L	predicted (union)
MFAP5	predicted (union)
MFRP	predicted (union)
MFSD4A	predicted (union)
MFSD4B	predicted (union)
MFSD6	predicted (union)
MGA	predicted (union)
MGAT3	predicted (union)
MGEA5	predicted (union)
MGLL	predicted (union)
MGME1	predicted (union)
MGP	predicted (union)
MGRN1	predicted (union)
MICAL3	predicted (union)
MICB	predicted (union)
MID1	experimental (weak)
MID1IP1	predicted (union)
MIEF1	predicted (union)
MIER1	predicted (union)
MINOS1	predicted (union)
MIP	predicted (union)
MIPOL1	predicted (union)
MIS12	predicted (union)
MISP	predicted (union)
MKI67	predicted (union)
MKLN1	predicted (union)
MKNK1	predicted (union)
MKRN2	predicted (union)
MLANA	predicted (union)
MLEC	predicted (union)
MLF1IP	predicted (union)
MLH3	predicted (union)
MLLT11	predicted (union)
MLLT3	predicted (union)
MLX	predicted (union)
MMAA	predicted (union)
MMP15	predicted (union)
MMP16	predicted (union)
MMP3	predicted (union)
MMP9	predicted (union)
MMRN1	predicted (union)
MMS19	predicted (union)
MMS22L	predicted (union)
MOB1B	predicted (union)
MOB4	experimental (weak)
MOCS2	predicted (union)
MOCS3	predicted (union)
MORC4	predicted (union)
MOSPD1	predicted (union)
MOSPD2	predicted (union)
MPHOSPH9	predicted (union)
MPI	predicted (union)
MPP2	predicted (union)
MPZL1	predicted (union)
MR1	predicted (union)
MRC2	predicted (union)
MRGPRG-AS1	predicted (union)
MRO	predicted (union)
MROH2B	predicted (union)
MROH7	predicted (union)
MROH9	predicted (union)
MRPL18	predicted (union)
MRPL21	predicted (union)
MRPL27	predicted (union)
MRPL28	predicted (union)
MRPL35	experimental (weak) + predicted (intersection) + predicted (union)
MRPS25	predicted (union)
MRTO4	predicted (union)
MRVI1	predicted (union)
MS4A2	predicted (union)
MS4A4A	predicted (union)
MSANTD1	predicted (union)
MSH4	predicted (union)
MSL2	predicted (union)
MSL3	experimental (weak) + predicted (union)
MSR1	predicted (union)
MSRB1	predicted (union)
MSRB2	predicted (union)
MSS51	predicted (union)
MST1R	predicted (union)
MSX2	predicted (union)
MTAP	predicted (union)
MTCP1	predicted (union)
MTERF1	predicted (union)
MTF1	predicted (intersection) + predicted (union)
MTHFD2L	predicted (union)
MTHFR	predicted (union)
MTL5	predicted (union)
MTMR10	predicted (union)
MTMR12	predicted (union)
MTMR2	predicted (union)
MTMR4	predicted (union)
MTMR9	predicted (union)
MTNR1B	predicted (union)
MTO1	predicted (union)
MTPAP	predicted (union)
MTPN	predicted (union)
MTR	predicted (union)
MTRF1L	predicted (union)
MTSS1	predicted (union)
MTSS1L	predicted (union)
MTUS1	predicted (union)
MUC19	predicted (union)
MUC20	predicted (union)
MUC4	predicted (union)
MUSTN1	predicted (union)
MUT	predicted (union)
MXD1	predicted (union)
MXD3	experimental (weak)
MXI1	predicted (union)
MXRA5	predicted (union)
MXRA7	predicted (union)
MYADM	predicted (union)
MYCBP	predicted (union)
MYDGF	predicted (union)
MYLK3	predicted (union)
MYO16	predicted (union)
MYO18A	predicted (union)
MYO1C	predicted (union)
MYO1H	predicted (union)
MYO3B	predicted (union)
MYO5B	predicted (union)
MYO6	predicted (union)
MYO9A	predicted (union)
MYOF	predicted (union)
MYPN	predicted (union)
MYSM1	predicted (union)
N6AMT1	predicted (union)
NAA11	predicted (union)
NAA50	predicted (intersection) + predicted (union)
NACC1	experimental (weak) + predicted (union)
NACC2	predicted (union)
NAGK	predicted (union)
NAMPT	predicted (union)
NAMPTP1	predicted (union)
NANOS1	predicted (union)
NAPEPLD	predicted (union)
NAV1	predicted (union)
NAV2	predicted (union)
NBEA	experimental (weak) + predicted (union)
NBN	predicted (union)
NBPF10	predicted (union)
NBPF11	predicted (union)
NBPF12	predicted (union)
NBPF15	predicted (union)
NBPF16	predicted (union)
NBPF20	predicted (union)
NBPF24	predicted (union)
NBPF3	predicted (union)
NBPF9	predicted (union)
NCAM1	predicted (union)
NCAPD3	predicted (union)
NCOA1	predicted (intersection) + predicted (union)
NCOA2	predicted (union)
NCOA6	experimental (weak) + predicted (union)
NCOA7	predicted (union)
NCOR1	predicted (union)
NCR3LG1	predicted (union)
NDEL1	predicted (union)
NDFIP1	predicted (union)
NDUFA9	predicted (union)
NDUFAF5	predicted (union)
NDUFS1	predicted (union)
NEB	predicted (union)
NEBL	predicted (union)
NEDD4	predicted (intersection) + predicted (union)
NEDD4L	predicted (union)
NEDD9	experimental (strong) + predicted (intersection) + predicted (union)
NEK7	predicted (union)
NEK9	predicted (union)
NELL2	predicted (union)
NEO1	experimental (strong) + predicted (union)
NETO2	predicted (union)
NEURL1	predicted (union)
NEURL1B	predicted (union)
NEUROD1	predicted (union)
NEUROD2	predicted (union)
NEUROG2	predicted (union)
NFASC	predicted (union)
NFAT5	predicted (intersection) + predicted (union)
NFATC2	predicted (union)
NFATC2IP	predicted (union)
NFATC3	predicted (union)
NFE2	predicted (union)
NFIA	predicted (union)
NFU1	predicted (union)
NHLRC2	predicted (union)
NHLRC3	predicted (union)
NHS	predicted (union)
NIP7	predicted (union)
NIPA1	predicted (union)
NIPAL2	predicted (union)
NIPAL3	predicted (union)
NKAIN2	predicted (union)
NKD2	predicted (union)
NKIRAS1	predicted (intersection) + predicted (union)
NKTR	predicted (union)
NLGN4Y	predicted (union)
NLN	predicted (union)
NLRC5	predicted (union)
NLRP2	predicted (union)
NMNAT2	predicted (union)
NMT1	predicted (union)
NMT2	predicted (union)
NMUR1	predicted (union)
NOC3L	predicted (union)
NOL4	predicted (union)
NOL8	predicted (union)
NOL9	predicted (union)
NOMO2	predicted (union)
NOMO3	predicted (union)
NOS1	predicted (union)
NOTCH2	predicted (union)
NOVA2	predicted (union)
NPAP1	predicted (union)
NPAS4	predicted (union)
NPC1L1	predicted (union)
NPHP3	predicted (union)
NPHP4	predicted (union)
NPL	predicted (union)
NPLOC4	predicted (union)
NPY1R	predicted (union)
NR1D2	predicted (union)
NR1H2	predicted (union)
NR1H4	predicted (union)
NR1I2	predicted (intersection) + predicted (union)
NR3C1	experimental (strong) + predicted (intersection) + predicted (union)
NR4A1	predicted (union)
NR5A2	predicted (union)
NR6A1	predicted (union)
NRCAM	predicted (union)
NREP	predicted (union)
NRF1	predicted (union)
NRG1	predicted (union)
NRP2	predicted (union)
NRSN1	predicted (union)
NRSN2	predicted (union)
NRXN1	predicted (union)
NSUN2	predicted (union)
NT5C3B	predicted (union)
NT5DC2	predicted (union)
NT5E	predicted (union)
NTAN1	predicted (union)
NTM	predicted (union)
NTRK3	predicted (union)
NUBPL	predicted (union)
NUCKS1	predicted (union)
NUDT21	predicted (union)
NUDT4	predicted (union)
NUFIP2	predicted (union)
NUP107	predicted (union)
NUP155	predicted (union)
NUP160	predicted (union)
NUP37	predicted (union)
NUS1	predicted (union)
NUSAP1	predicted (union)
NWD1	predicted (union)
NXT2	predicted (intersection) + predicted (union)
OARD1	predicted (union)
OAS3	predicted (union)
OCLN	predicted (union)
OCRL	predicted (union)
ODF2L	predicted (union)
ODF3L2	predicted (union)
ODZ3	predicted (union)
OLFM4	predicted (union)
OLFML2B	predicted (intersection) + predicted (union)
OLR1	predicted (union)
ONECUT2	predicted (union)
ONECUT3	predicted (union)
OPA3	predicted (union)
OPALIN	predicted (union)
OPRL1	predicted (union)
OR10H2	predicted (union)
OR2C1	predicted (union)
OR2L13	predicted (union)
OR4D10	predicted (union)
OR9Q2	predicted (union)
[truncated: 1,549 more rows]
